# Supplementary material for: Motif-directed network component analysis for regulatory network inference
Source: PubMed Central journal article supplement (PMC2259422; doi:10.1186/1471-2105-9-s1-s21), 2008-02-13
Supplement: 1471-2105-9-S1-S21-S1.pdf [file 1471-2105-9-S1-S21-S1.pdf]

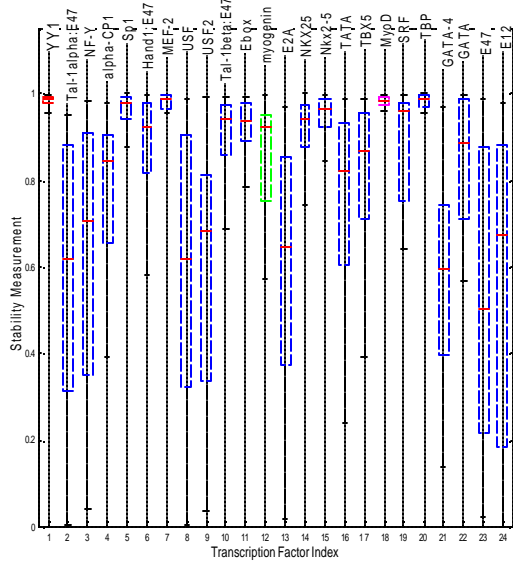

(a)

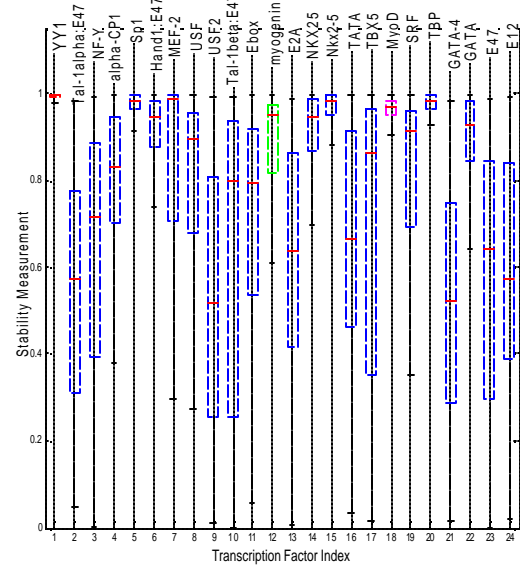

(b)

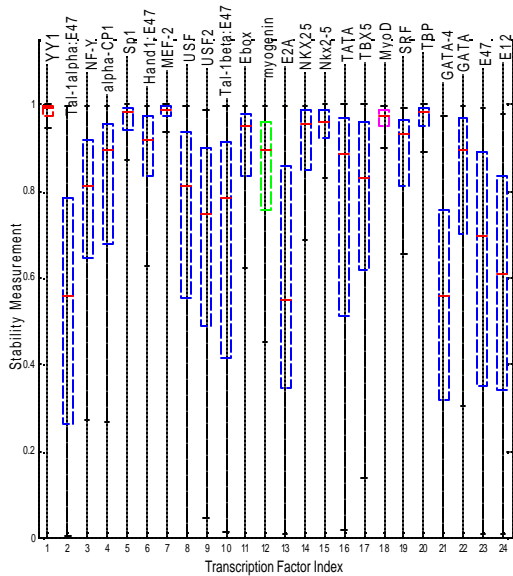

(c)

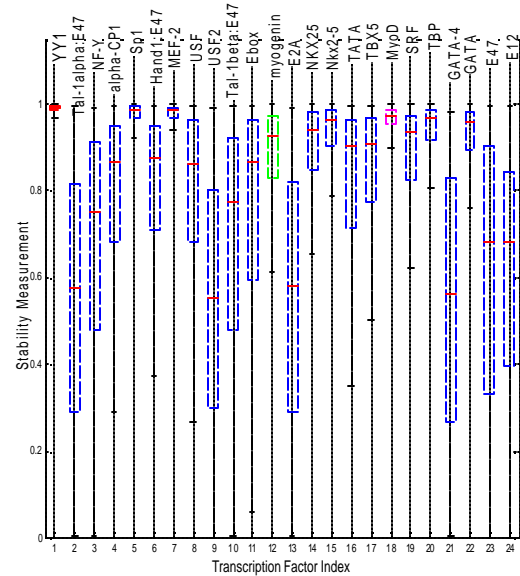

(d)

**Additional file 1: Stability analysis using mNCA with different number of perturbations (denoted as NP). Stability measurements with (a) NP = 10, (b) NP = 15, (c) NP = 20 and (d) NP = 30. The boxes with red, green, purple colour are the stability measurements of YY1, myogenin and MyoD, respectively .**
